# Supplementary material for: Evaluation of MYBPC3 trans-Splicing and Gene Replacement as Therapeutic Options in Human iPSC-Derived Cardiomyocytes
Source: PubMed Central journal article supplement — Mol Ther Nucleic Acids. 2017 May 17;7:475–86. doi: 10.1016/j.omtn.2017.05.008 (PMC5458066; doi:10.1016/j.omtn.2017.05.008), 2017-05-17
Supplement: mmc1.pdf [file mmc1.pdf]

OMTN, Volume 7

## Supplemental Information

### **Evaluation of *MYBPC3* *trans*-Splicing and Gene Replacement as Therapeutic Options in Human iPSC-Derived Cardiomyocytes**

**Maksymilian Prondzynski, Elisabeth Krämer, Sandra D. Laufer, Aya Shibamiya, Ole Pless, Frederik Flenner, Oliver J. Müller, Julia Münch, Charles Redwood, Arne Hansen, Monica Patten, Thomas Eschenhagen, Giulia Mearini, and Lucie Carrier**

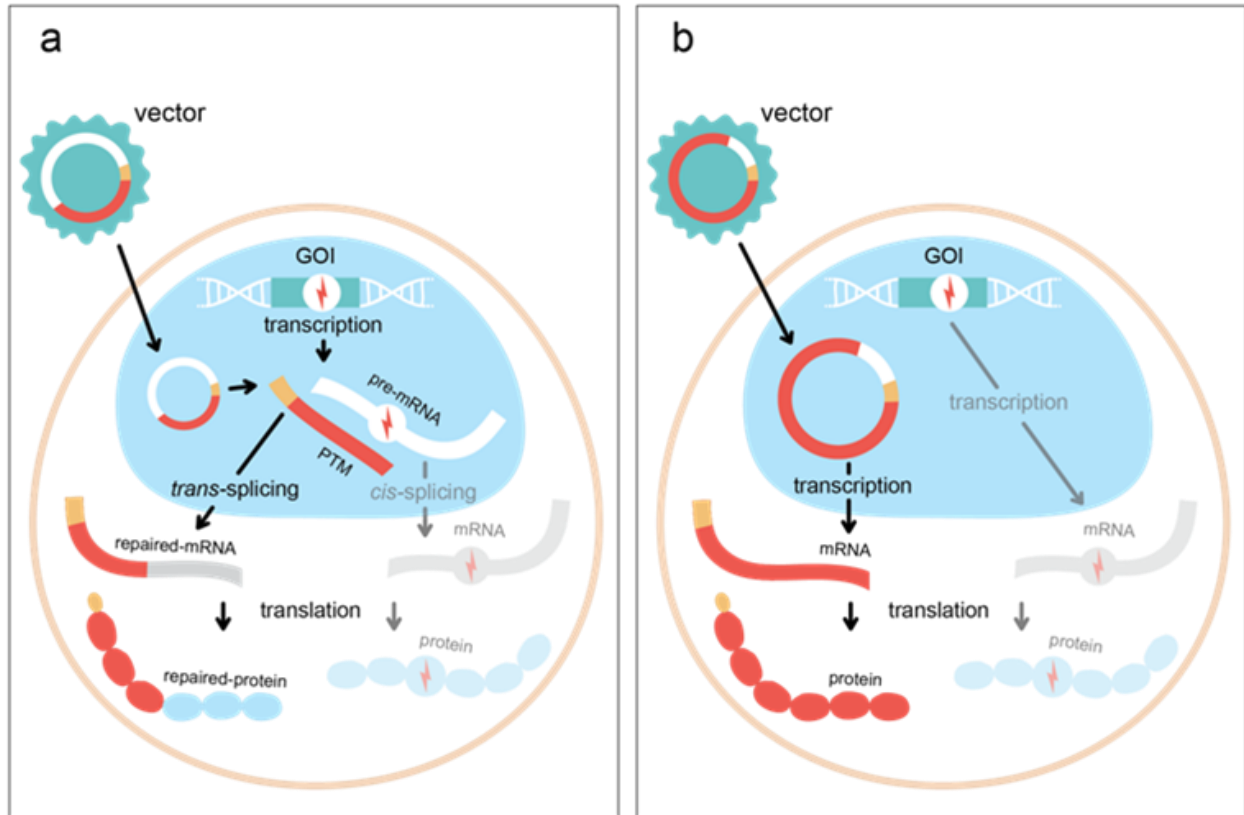

**Figure S1: Schematic representation of two gene therapy approaches.** (a) RNA *trans*-splicing. After virus-mediated delivery, pre-*trans*-splicing molecules (PTMs) are transcribed in the nucleus. PTMs target the pre-mRNA of the gene of interest (GOI) and produce via *trans*-splicing a repaired, chimeric mRNA, without mutation. Translation of the repaired mRNA leads to a corrected fully functional protein. This process is competing with *cis*-splicing, the classical splicing mechanism, by which endogenous mRNA and proteins are produced. (b) Gene replacement. The mutation in the GOI results in low level or the absence of corresponding protein. After virus-mediated delivery, a full-length wild-type cDNA of GOI is transcribed in the nucleus. The resulting mRNA is translated into functional protein that replaces the missing mutant endogenous protein. GOI: gene of interest; yellow tag: i.e. FLAG to discriminate exogenous molecules; red bolt: gene mutation.

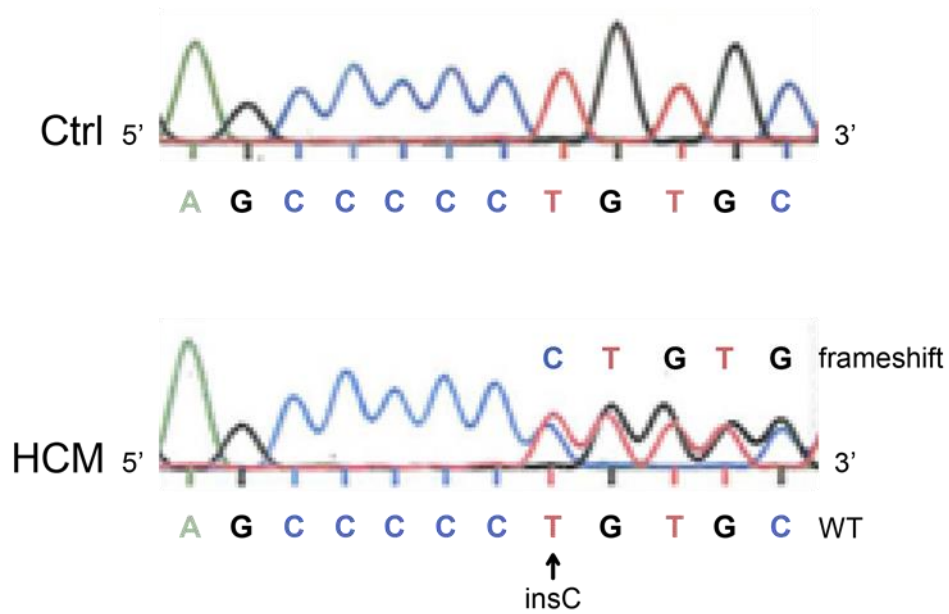

**Figure S2: Validation of the *MYBPC3* mutation at the genomic level.** PCR was performed on genomic DNA from blood cells from the HCM patient using intronic primers around *MYBPC3* exon 16 and compared to a human control sequence. Sanger sequencing confirmed the presence of an insertion of a C (c.1358\_1359insC) at the heterozygous state in the HCM patient. Wild-type and frameshift sequences are also shown.

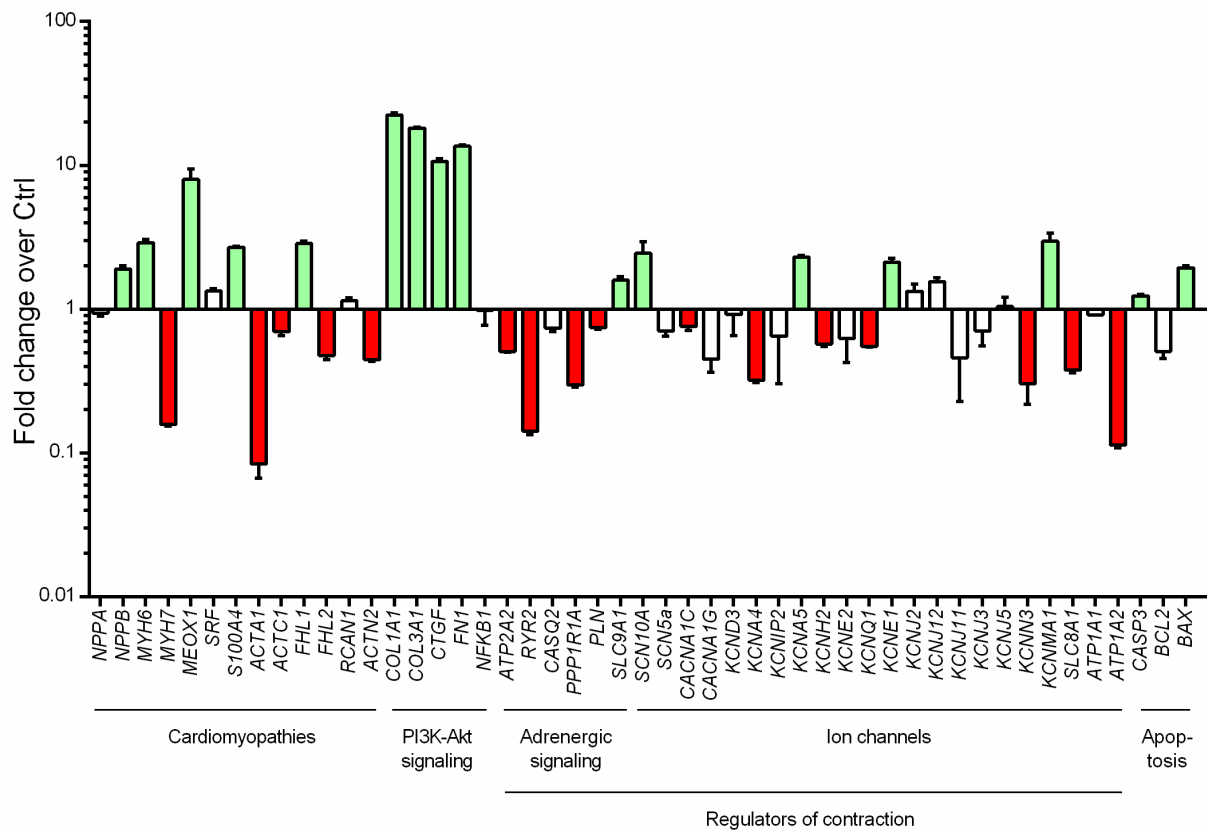

**Figure S3: Gene expression analysis of Ctrl and HCM hiPSC-derived cardiomyocytes.** Evaluation of mRNA levels determined by nCounter NanoString technology in Ctrl and HCM hiPSC-derived CM (n=3-6, with n=number of wells from one transduction experiment). Green bars are significantly upregulated and red bars are significantly downregulated. Data are expressed as mean  $\pm$  SEM.  $P < 0.05$ , unpaired Students  $t$ -test.

**a**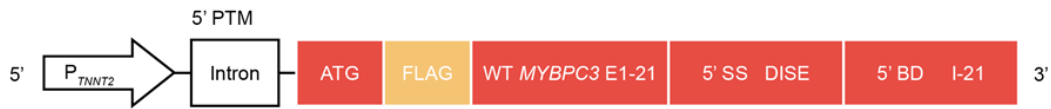**b**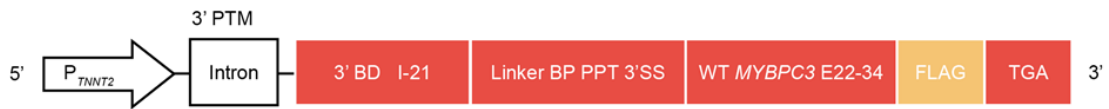

**Figure S4: Schematic illustration of PTMs.** (a) The 5'PTM plasmid carries the 5'-FLAG-tagged wild-type (WT) *MYBPC3* coding sequence of exons 1 to 21 under the control of the human cardiac troponin T promoter (*TNNT2*). The 5'PTM also included a chimeric intron, containing sequences from the human  $\beta$ -globin and immunoglobulin (IgG) genes, conserved splice donor site (5'SS) followed by an intronic region (DISE) from the rat fibroblast growth factor receptor 2 gene and 120 nucleotides for binding to *MYBPC3* intron 21 (5' BD I-21). (b) The 3'PTM plasmid carries wild-type (WT) *MYBPC3* coding sequence of exons 22 to 34 under the control of the human cardiac troponin T promoter (*TNNT2*). The sequence is FLAG-tagged at the 3' end before the stop codon (TGA). The 3'PTM includes the same intron as in (a) and the binding domain targets the same sequence in *MYBPC3* intron 21 as 5'PTM. In addition, conserved 3' splicing sequences such as branch point (BP) and polypyrimidine tract (PPT) are present. ATG, start codon; BP, branch point; DISE, downstream intronic splicing enhancer element;  $P_{TNNT2}$ , cardiac troponin T promoter; PPT, polypyrimidine tract; TGA, stop codon; 5'SS, 5'-splice site; 3'SS, 3'-splice site.

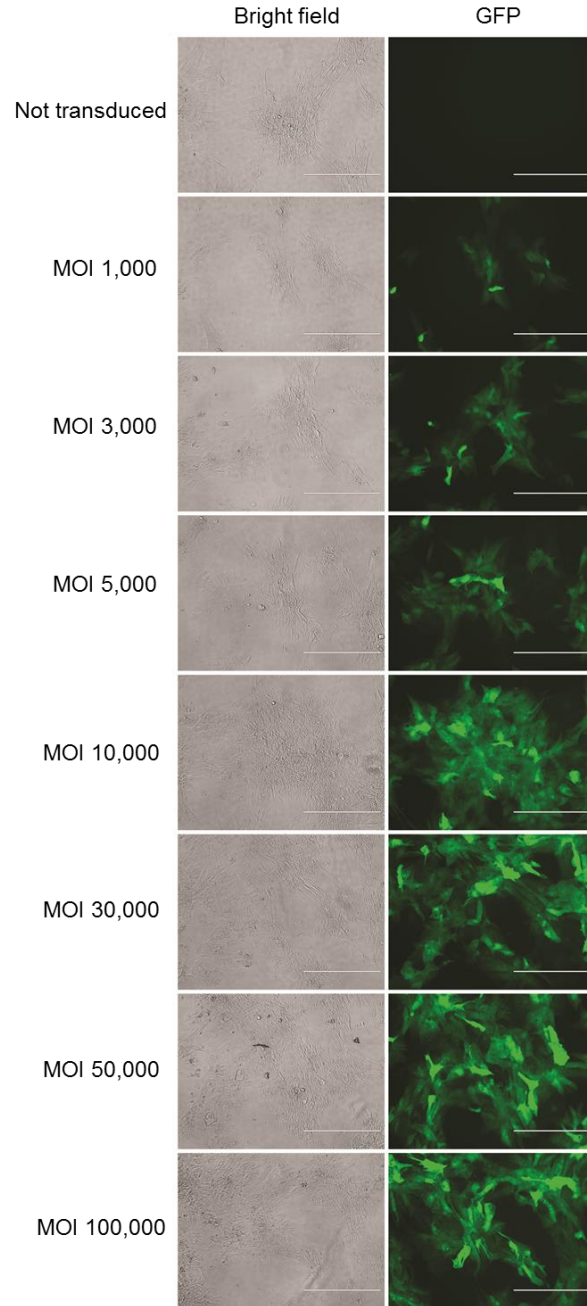

**Figure S5: Efficiency of AAV-*TNNT2*-GFP-mediated transduction in control hiPSC-derived cardiomyocytes.**

hiPSC-CMs were transduced with MOIs of 1,000 up to 100,000 and cultured in 2D for seven days. GFP expression was evaluated by epifluorescence microscopy. Corresponding bright field images are also shown. Scale bars, 400  $\mu$ m. GFP, green fluorescent protein; MOI, multiplicity of infection.

**a**

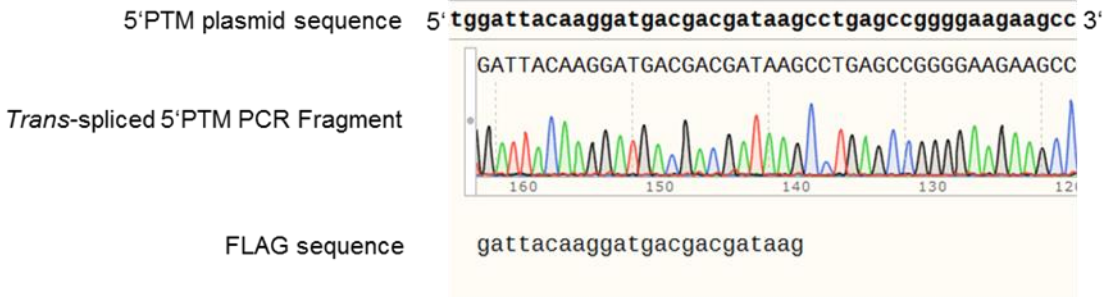

**b**

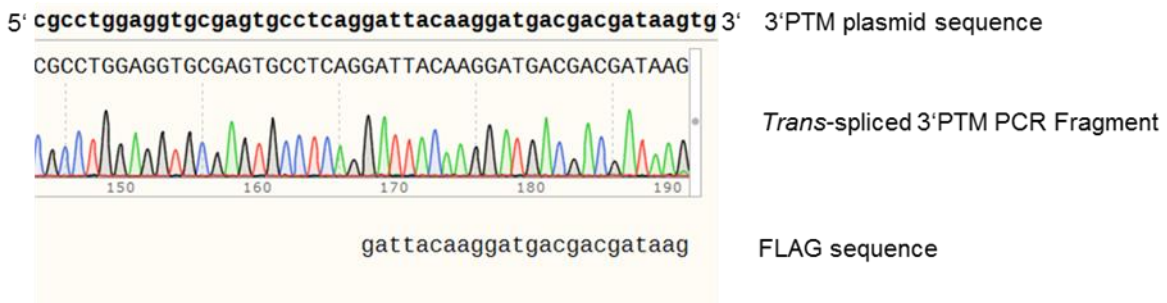

**Figure S6: Validation of *trans*-spliced *MYBPC3* mRNA after 5'- and 3'-mode of *trans*-splicing.** (a) Sequencing of the gel-extracted 2,180-bp fragment amplified by RT-PCR with primers FLAG-F/E23-R in the AAV-5'PTM-transduced hiPSC-CMs sample validated the presence of the FLAG sequence after alignment with the 5'PTM plasmid. (b) Sequencing of the gel-extracted 1,874-bp fragment amplified by RT-PCR with primers E21-F/FLAG-R in AAV-3'PTM-transduced hiPSC-CMs sample validated the presence of the FLAG sequence after alignment with the 3'PTM. Alignment was performed with SnapGene® software. E, exon; RT-PCR, reverse transcriptase PCR.

**Supplemental Table S1.** Acronyms and names of genes evaluated with the nanoString nCounter® Elements technology.

| Acronym | Name                                                                              | Accession number (NCBI) |
|---------|-----------------------------------------------------------------------------------|-------------------------|
| ABCF1   | ATP binding cassette subfamily F member 1                                         | NM_001090.2             |
| ACTA1   | Actin, alpha, skeletal muscle                                                     | NM_001100.3             |
| ACTC1   | Actin, alpha, cardiac muscle 1                                                    | NM_005159.4             |
| ACTN2   | Alpha-Actinin 2                                                                   | NM_001103.2             |
| ATP1A1  | Na/K-ATPase $\alpha$ 1 subunit                                                    | NM_000702.3             |
| ATP1A2  | Na/K-ATPase $\alpha$ 2 subunit                                                    | NM_001681.3             |
| ATP2A2  | ATPase sarcoplasmic/endoplasmic reticulum Ca <sup>2+</sup> transporting 2         | NM_001681.3             |
| BAX     | BCL2 associated X, apoptosis regulator                                            | NM_138761.3             |
| BCL2    | BCL2, apoptosis regulator                                                         | NM_000657.2             |
| CACNA1C | Calcium voltage-gated channel subunit alpha1 C (L-Type Ca <sup>2+</sup> channel)  | NM_199460.2             |
| CACNA1G | Calcium voltage-gated channel subunit alpha1 G (T type Ca <sup>2+</sup> channel)  | NM_198397.1             |
| CASP3   | Caspase 3                                                                         | NM_032991.2             |
| CASQ2   | Calsequestrin-2                                                                   | NM_001232.3             |
| CLTC    | Clathrin heavy chain                                                              | NM_004859.2             |
| COL1A1  | Collagen type I alpha 1                                                           | NM_000088.3             |
| COL3A1  | Collagen type III alpha 1                                                         | NM_000090.3             |
| CTGF    | Connective tissue growth factor                                                   | NM_001901.2             |
| FHL1    | Four-and-a-half-LIM-domains 1                                                     | NM_001449.4             |
| FHL2    | Four-and-a-half-LIM-domains 2                                                     | NM_001039492.2          |
| FN1     | Fibronectin 1                                                                     | NM_212482.1             |
| GAPDH   | Glyceraldehyde-3-phosphate dehydrogenase                                          | NM_002046.3             |
| KCNA4   | Potassium voltage-gated channel subfamily A member 4 (Ito,s K+ channel)           | NM_002233.3             |
| KCNA5   | Potassium voltage-gated channel subfamily A member 5 (IKUR)                       | NM_002234.2             |
| KCND3   | Potassium voltage-gated channel subfamily D member 3 (Ito, f beta subunit, Kv4.3) | NM_004980.4             |
| KCNE1   | Potassium voltage-gated channel subfamily E regulatory subunit 1 (MinK, Iks)      | NM_001127670.1          |
| KCNE2   | Potassium voltage-gated channel subfamily E regulatory subunit 2 (MIRP2, Ikr)     | NM_172201.1             |
| KCNH2   | Potassium voltage-gated channel subfamily H member 2 (Ikr K+ channel)             | NM_172057.2             |
| KCNIP2  | Potassium voltage-gated channel interacting protein 2 (KChIP2 beta subunit, Ito)  | NM_014591.4             |
| KCNJ11  | Potassium voltage-gated channel subfamily J member 11 (Kir 6.2, IkATP)            | NM_000525.3             |
| KCNJ12  | Potassium voltage-gated channel subfamily J member 12 (Ik1 channel subunit 2)     | NM_021012.4             |
| KCNJ2   | Potassium voltage-gated channel subfamily J member 2 (Ik1 channel)                | NM_000891.2             |
| KCNJ3   | Potassium voltage-gated channel subfamily J member 3 (IKACH)                      | NM_001260508.1          |
| KCNJ5   | Potassium voltage-gated channel subfamily J member 5 (IKACH)                      | NM_000890.3             |
| KCNMA1  | Potassium calcium-activated channel subfamily M alpha 1 (BK Channel)              | NM_001014797.2          |
| KCNN3   | Potassium calcium-activated channel subfamily N member 3 (SK3)                    | NM_002249.4             |
| KCNQ1   | Potassium voltage-gated channel subfamily Q member 1 (Iks K+ channel)             | NM_181798.1             |
| MEOX1   | Mesenchyme homeobox 1                                                             | NM_001040002.1          |
| MYH6    | Myosin heavy chain 6                                                              | NM_002471.3             |
| MYH7    | Myosin heavy chain 7                                                              | NM_000257.2             |
| NFKB1   | Nuclear factor kappa B subunit 1                                                  | NM_003998.2             |
| NPPA    | Natriuretic peptide A                                                             | NM_006172.2             |
| NPPB    | Natriuretic peptide B                                                             | NM_002521.2             |
| PGK1    | Phosphoglycerate kinase 1                                                         | NM_000291.2             |
| PLN     | Phospholamban                                                                     | NM_002667.3             |
| PPP1R1A | Protein phosphatase 1, regulatory (inhibitor) subunit 1A (I-1)                    | NM_006741.3             |
| RCAN1   | Regulator of calcineurin 1                                                        | NM_004414.5             |
| RYR2    | Ryanodine receptor 2                                                              | NM_001035.2             |
| S100A4  | S100 calcium binding protein A4 (=FSP1)                                           | NM_002961.2             |
| SCN10A  | Sodium voltage-gated channel alpha subunit 10 (Na+ channel, Nav1.8)               | NM_006514.2             |
| SCN5A   | Sodium voltage-gated channel alpha subunit 5 (Na+ channel, Nav1.5)                | NM_198056.2             |
| SLC8A1  | Solute carrier family 8 member A1 (Natrium-Calcium Exchanger, NCX)                | NM_021097.1             |
| SLC9A1  | Solute carrier family 9 member A1 (Na+/H+ exchanger)                              | NM_003047.4             |
| SRF     | Serum response factor                                                             | NM_003131.3             |
| TUBB    | Tubulin beta class 1                                                              | NM_178014.3             |



**Supplemental Table S2.** Sequences of PCR primers

| <b>Primer</b> | <b>Sequence (5' to 3')</b>                                         |
|---------------|--------------------------------------------------------------------|
| E1-F          | GCCAGTCTCAGCTTTTAGCAA                                              |
| E2-R          | CAGGCCGTACTTGTGCTG                                                 |
| I15-F         | CTGGGACCTGAGGATGTGGG                                               |
| I16-R         | GGTGGGTGGGTGGCAAGTG                                                |
| E15-F         | CCAAGCGTACCCTGACCA                                                 |
| E16-R         | CCCTCCTCCGATACTTCAACA                                              |
| E21-F         | CCATTGTGGTTGTAGCTGGA                                               |
| E23-R         | CACACAGCAGCTTCTTGTCAC                                              |
| E33-F         | CCCAAGATTTCTGGTTCAA                                                |
| E33-R         | CCTCGCCCTGTAAGTTGGT                                                |
| FLAG-F        | GGATTACAAGGATGACGACGA                                              |
| FLAG-R        | CTTATCGTCGTCATCCTTGTAATC                                           |
| GAPDH-F       | ATGTTTCGTCATGGGTGTGAA                                              |
| GAPDH-R       | TGAGTCCTTCCACGATACCA                                               |
| F3-1          | TTCCGACGCTAGCACCCACACTGCCCACCTT                                    |
| R3-1          | TGTTCCGCGGGGATCCTGTGTGGAACCAGCCAAG                                 |
| F3-2          | GTTCCACACAGGATCCCCGCGGAACATTATTATAAC                               |
| R3-2          | CCTTATCCCCTGTTTTCCGGAAA                                            |
| F3-3          | TTCCGAAAACAGGGGAATAAGGC                                            |
| R3-3          | TTCCGACGCGCCGCTCACTTATCGTCGTCATCCTTGTAATCCTGAGGCACTCG              |
| F5-1          | TTCCGACGCTAGCATGGATTACAAGGATGACGACGATAAGCCTGAGCCGGGAAGA            |
| R5-1          | AGTGTGGGTGGATCCAGGCCAACCATGGAAAGAAAGAGCTGTACTCACCTGCGTGATAGCCTTCTG |
| F5-2          | GGGTTGGCCTGGATCCACCCACACTGCCCACCTT                                 |
| R5-2          | TTCCGACGCGCCGCTGTGTGGAACCAGCCAAG                                   |
